# Supplementary material for: Heat Wave Magnitude Projection in the Middle Awash Basin Under Coupled Model Intercomparison Project the 6th Phase (CMIP6)
Source: Preprints.org preprint supplement (doi:10.20944/preprints202306.0606.v1), 2023-06-08
Supplement: Supplementary file 1 [file supplementary]

	SSP 2-4.5	SSP 5-8.5	Observation
1981	-0.238235294	-0.238235294	-0.46
1982	-1.588235294	-1.588235294	-1.83
1983	-1.038235294	-1.038235294	-1.32
1984	-0.338235294	-0.338235294	0.36
1985	-0.688235294	-0.688235294	-1.67
1986	-0.538235294	-0.538235294	-1.31
1987	-0.088235294	-0.088235294	-0.53
1988	-0.038235294	-0.038235294	-0.23
1989	-0.088235294	-0.088235294	-0.538235294
1990	0.111764706	0.111764706	-0.4
1991	1.111764706	1.111764706	1.27
1992	-1.188235294	-1.188235294	-1.3
1993	-0.488235294	-0.488235294	-1.62
1994	-0.688235294	-0.688235294	-0.21
1995	-0.338235294	-0.338235294	-0.8
1996	0.111764706	0.111764706	-0.79
1997	-0.588235294	-0.588235294	-0.73
1998	0.311764706	0.311764706	-0.03
1999	0.811764706	0.811764706	0.07
2000	0.111764706	0.111764706	0.26
2001	0.011764706	0.011764706	-0.19
2002	0.011764706	0.011764706	0.82
2003	1.011764706	1.011764706	0.17
2004	0.611764706	0.611764706	0.35
2005	0.761764706	0.761764706	0.9
2006	0.111764706	0.111764706	0.48
2007	0.311764706	0.311764706	0.54
2008	0.511764706	0.511764706	1.01
2009	1.011764706	1.011764706	1.31
2010	0.511764706	0.511764706	0.34
2011	0.711764706	0.711764706	0.14
2012	0.611764706	0.611764706	1.47
2013	0.061764706	0.061764706	0.1
2014	1.011764706	1.011764706	0.07
2015	1.661764706	1.661764706	1.99
2016	1.011764706	0.961764706	1.29
2017	0.261764706	0.761764706	1.65
2018	1.061764706	0.611764706	0.82
2019	0.261764706	0.361764706	1.11
2020	0.511764706	1.211764706	0.61
2021	1.211764706	0.461764706
2022	1.061764706	0.711764706
2023	0.561764706	0.661764706
2024	0.961764706	0.461764706
2025	0.861764706	0.961764706
2026	1.011764706	1.661764706
2027	1.661764706	0.811764706
2028	0.661764706	1.461764706
2029	1.711764706	0.761764706
2030	1.061764706	1.111764706
2031	1.361764706	0.611764706
2032	1.211764706	1.361764706
2033	1.061764706	1.561764706
2034	0.961764706	1.411764706
2035	1.361764706	0.711764706
2036	0.911764706	1.261764706
2037	1.011764706	0.811764706
2038	1.261764706	1.361764706
2039	1.811764706	1.461764706
2040	1.111764706	1.011764706
2041	1.261764706	0.961764706
2042	0.961764706	1.461764706
2043	1.411764706	2.361764706
2044	0.961764706	1.561764706
2045	1.561764706	2.811764706
2046	1.511764706	1.761764706
2047	1.561764706	1.761764706
2048	0.311764706	1.861764706
2049	1.661764706	2.361764706
2050	1.511764706	1.561764706
2051	1.761764706	1.611764706
2052	1.611764706	2.311764706
2053	1.661764706	2.111764706
2054	1.411764706	2.111764706
2055	1.561764706	2.411764706
2056	2.111764706	2.261764706
2057	1.911764706	2.161764706
2058	2.661764706	2.761764706
2059	2.361764706	2.011764706
2060	1.461764706	3.211764706
2061	1.311764706	2.711764706
2062	2.361764706	2.011764706
2063	1.761764706	3.211764706
2064	1.761764706	3.111764706
2065	1.961764706	2.311764706
2066	1.761764706	3.361764706
2067	1.511764706	3.011764706
2068	2.011764706	3.411764706
2069	1.861764706	3.061764706
2070	2.011764706	3.111764706
2071	2.011764706	2.711764706
2072	1.711764706	3.611764706
2073	2.311764706	3.811764706
2074	2.811764706	3.961764706
2075	2.261764706	4.861764706
2076	1.511764706	4.211764706
2077	1.461764706	4.011764706
2078	2.311764706	3.761764706
2079	2.761764706	3.661764706
2080	2.711764706	3.861764706
2081	2.861764706	3.811764706
2082	1.911764706	3.711764706
2083	2.411764706	4.461764706
2084	1.361764706	4.311764706
2085	2.061764706	4.461764706
2086	2.061764706	4.511764706
2087	2.561764706	5.861764706
2088	1.811764706	4.511764706
2089	2.161764706	4.311764706
2090	2.911764706	4.311764706
2091	2.311764706	5.661764706
2092	2.511764706	5.311764706
2093	2.911764706	5.261764706
2094	2.511764706	5.011764706
2095	2.611764706	4.861764706
2096	3.061764706	5.461764706
2097	2.011764706	6.111764706
2098	2.261764706	5.861764706
2099	2.711764706	5.461764706
2100	2.711764706	6.261764706
